# Supplementary material for: Predicting outcomes of COVID-19 from admission biomarkers: a prospective UK cohort study
Source: HighWire-hosted journal article supplement (doi:10.1136/emermed-2020-210380), 2021-05-21
Supplement: emermed-2020-210380supp001_data_supplement.pdf [file emermed-2020-210380supp001_data_supplement.pdf]

## Supplementary 1: ROC plots for each biomarker for the primary outcome

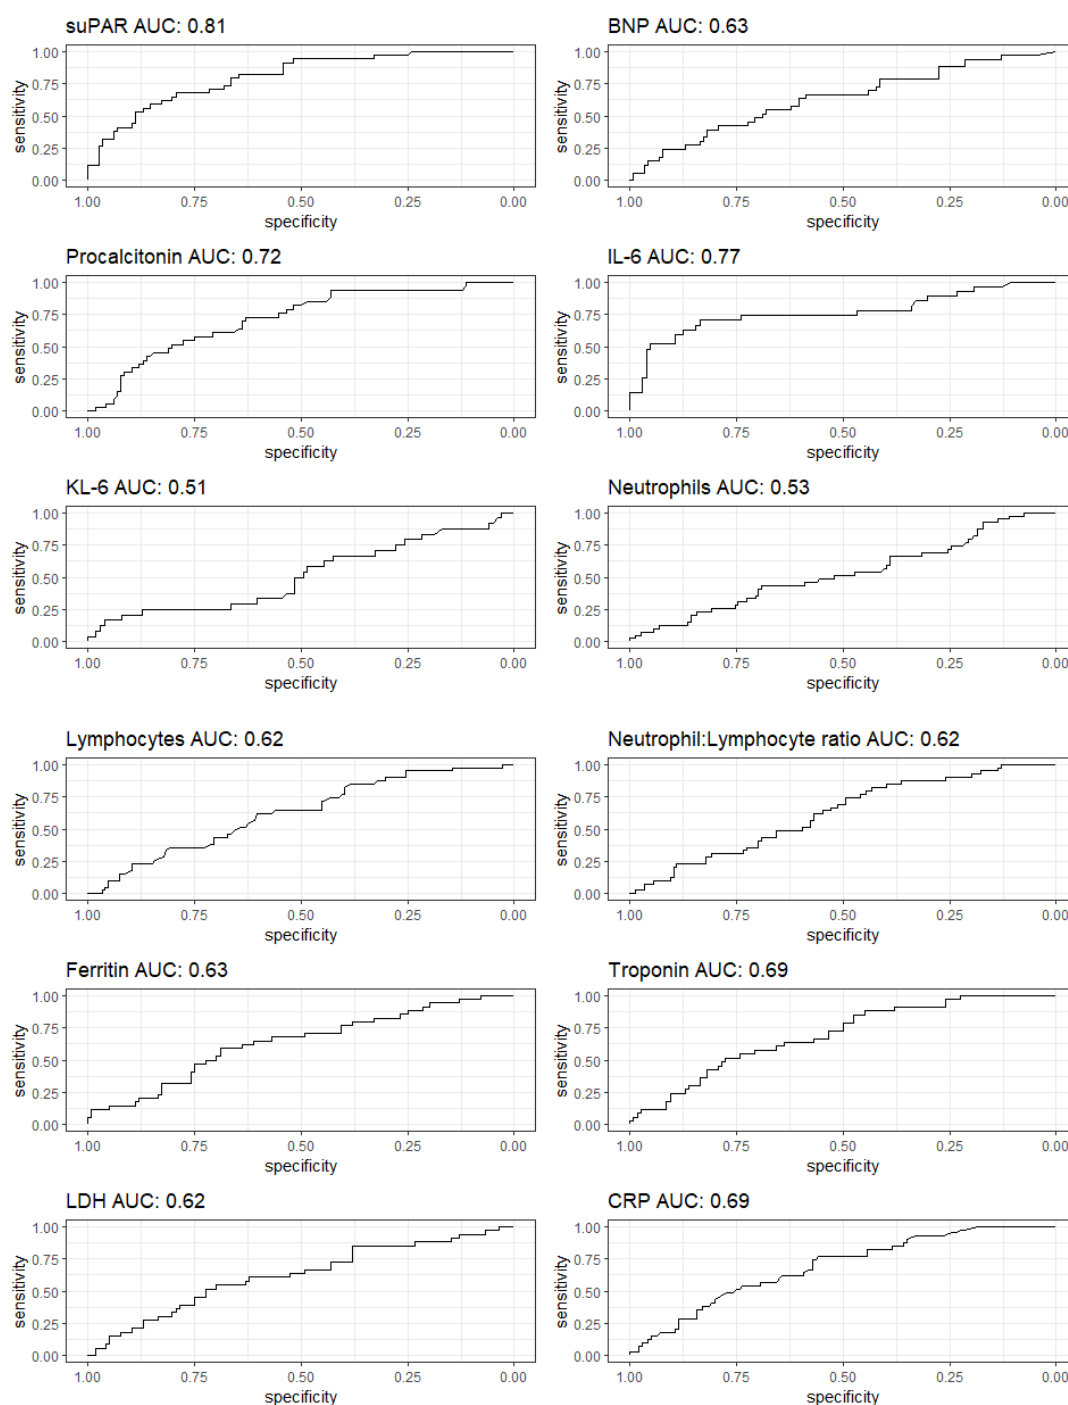

Supplementary 2: Performance of each biomarker on the composite of ITU admission and mortality;  
ROC plots and diagnostic performance

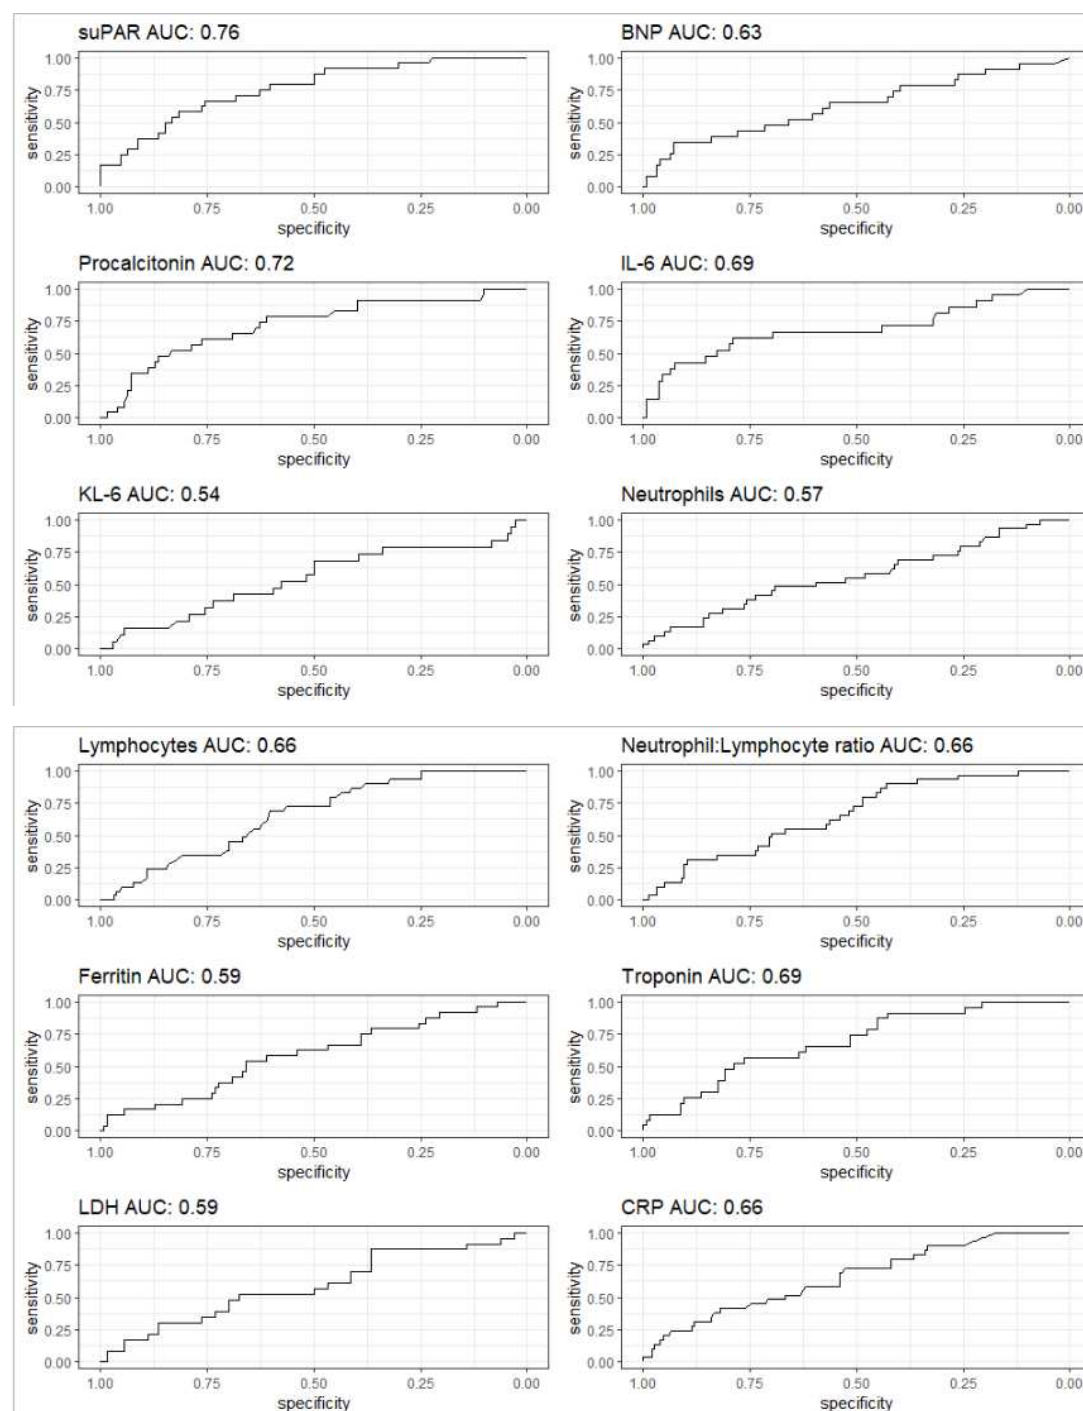

## Supplement 3: Proven vs suspected cases – a comparison

| Characteristic                                  | Proven, N = 142 | Suspected, N = 45 | p-value |
|-------------------------------------------------|-----------------|-------------------|---------|
| Age (18+)                                       | 61 (47, 75)     | 53 (41, 62)       | 0.010   |
|                                                 |                 |                   | 0.7     |
| Male                                            | 78 (55%)        | 23 (51%)          |         |
| Female                                          | 64 (45%)        | 22 (49%)          |         |
|                                                 |                 |                   | 0.049   |
| Inpatient                                       | 115 (81%)       | 42 (93%)          |         |
| Outpatient                                      | 27 (19%)        | 3 (6.7%)          |         |
| Diabetes status                                 |                 |                   | 0.2     |
| None                                            | 117 (82%)       | 32 (71%)          |         |
| T1DM                                            | 3 (2.1%)        | 1 (2.2%)          |         |
| T2DM                                            | 22 (15%)        | 12 (27%)          |         |
| Heart disease                                   | 39 (27%)        | 7 (16%)           | 0.11    |
| Chronic Lung disease                            | 39 (27%)        | 7 (16%)           | 0.11    |
| Severe Liver disease                            | 4 (2.8%)        | 1 (2.2%)          | >0.9    |
| Severe kidney impairment (eGFR< 30 or dialysis) | 18 (13%)        | 4 (8.9%)          | 0.5     |
| Hypertension                                    | 40 (28%)        | 12 (27%)          | 0.8     |
| HIV status                                      | 2 (1.4%)        | 0 (0%)            | >0.9    |
|                                                 |                 |                   |         |
| Primary outcome:                                |                 |                   | 0.6     |
| Survivor                                        | 111 (78%)       | 37 (82%)          |         |
| Non-survivor/ITU/NIV                            | 31 (22%)        | 8 (18%)           |         |
|                                                 |                 |                   |         |
| Non-white ethnicity                             | 21 (18%)        | 4 (10%)           | 0.3     |
| Median (IQR); n (%)                             |                 |                   |         |

## Supplement 4: Odds ratios (logged) for each predictor

| Term            | Coefficient | Lower 95%<br>CI | Higher 95%<br>CI | P value |
|-----------------|-------------|-----------------|------------------|---------|
| CRP             | 1.7918      | 1.3134          | 2.5712           | 0.0006  |
| Neutrophils     | 1.3993      | 0.7875          | 2.5014           | 0.2511  |
| Lymphocytes     | 0.4988      | 0.2604          | 0.9332           | 0.0316  |
| NLR             | 1.5346      | 1.0386          | 2.2912           | 0.0327  |
| IL6             | 2.3320      | 1.6058          | 3.5821           | 0.0000  |
| KL6             | 1.0008      | 0.9998          | 1.0018           | 0.1291  |
| suPAR           | 13.9827     | 5.2240          | 44.3974          | 0.0000  |
| LDH             | 2.8663      | 1.0115          | 8.7361           | 0.0540  |
| Ferritin        | 1.5478      | 1.1056          | 2.2308           | 0.0142  |
| Troponin T      | 1.7433      | 1.2442          | 2.5218           | 0.0018  |
| BNP             | 1.2597      | 1.0452          | 1.5305           | 0.0168  |
| NEWS (unlogged) | 1.3068      | 1.1497          | 1.4995           | 0.0001  |
| Age (unlogged)  | 1.0441      | 1.0209          | 1.0701           | 0.0003  |
